# Supplementary material for: Sesamol ameliorates dextran sulfate sodium-induced depression-like and anxiety-like behaviors in colitis mice: the potential involvement of the gut–brain axis
Source: Royal Society of Chemistry journal article supplement (doi:10.1039/d1fo03888e), 2022-01-01
Supplement: d1fo03888e1.pdf [file d1fo03888e1.pdf]

## Supporting information

### **Sesamol Ameliorates Dextran Sulfate Sodium-induced Depression-like and Anxiety-like Behaviors in Colitis Mice : The potential involvement of Gut-Brain Axis**

Bing Xia<sup>†</sup>, Xiaoning Liu<sup>†</sup>, Xiaohan Li<sup>†</sup>, Yutang Wang<sup>†</sup>, Danna Wang<sup>†</sup>, Rongwei Kou<sup>#</sup>,  
Li Zhang<sup>†</sup>, Renjie Shi<sup>†</sup>, Jin Ye<sup>†</sup>, Xiaowei Bo<sup>†</sup>, Qian Liu<sup>&</sup>, Beita Zhao<sup>†,\*</sup> and Xuebo Liu<sup>†,\*</sup>

Table S1. The F-value of all data.

| Number    | Name                                                      | F-value           |
|-----------|-----------------------------------------------------------|-------------------|
| Figure 1E | Histological score                                        | F (2, 21) = 69.01 |
| Figure 1F | TNF- $\alpha$                                             | F (2, 15) = 51.44 |
| Figure 1F | Il-1 $\beta$                                              | F (2, 15) = 56.11 |
| Figure 1I | Claudin 1                                                 | F (2, 6) = 94.75  |
| Figure 1H | Claudin 1                                                 | F (2, 15) = 59.45 |
| Figure 1J | LPS                                                       | F (2, 21) = 16.37 |
| Figure 2A | total traveled distance                                   | F (2, 21) = 22.07 |
| Figure 2A | the percentage of distance                                | F (2, 21) = 21.35 |
| Figure 2A | the percentage of time spent in center area               | F (2, 21) = 13.27 |
| Figure 2B | the percentage of time in open arms                       | F (2, 21) = 19.86 |
| Figure 2B | the percentage of entries in open arms                    | F (2, 21) = 8.252 |
| Figure 2C | MBT                                                       | F (2, 21) = 39.66 |
| Figure 2D | TST                                                       | F (2, 21) = 22.53 |
| Figure 3E | Iba1                                                      | F (2, 6) = 106.2  |
| Figure 3E | GFAP                                                      | F (2, 6) = 115.8  |
| Figure 4B | Western blot analysis for TLR-4                           | F (2, 6) = 61.43  |
| Figure 4C | Western blot analysis for p-NF- $\kappa$ B/NF- $\kappa$ B | F (2, 6) = 78.40  |
| Figure 4D | Western blot analysis for iNOS                            | F (2, 6) = 33.53  |
| Figure 4E | Western blot analysis for Cox-2                           | F (2, 6) = 123.6  |
| Figure 4F | Western blot analysis for p-IK $\beta$ /IK $\beta$        | F (2, 6) = 15.08  |
| Figure 4G | The mRNA expression of TLR-4 in the cortex                | F (2, 15) = 39.63 |
| Figure 4H | The mRNA expression of iNOS in the cortex                 | F (2, 15) = 44.81 |
| Figure 4I | The mRNA expression of Cox-2 in the cortex                | F (2, 15) = 77.06 |
| Figure 4J | The mRNA expression of TNF- $\alpha$ in the cortex        | F (2, 15) = 39.57 |
| Figure 4K | The mRNA expression of Il-6 in the cortex                 | F (2, 15) = 73.32 |
| Figure 4L | The mRNA expression of Il-1 $\beta$ in the cortex         | F (2, 15) = 37.89 |
| Figure 5A | MDA content in serum                                      | F (2, 12) = 33.23 |
| Figure 5B | MDA content in cortex                                     | F (2, 15) = 23.32 |
| Figure 5C | SOD content in serum                                      | F (2, 12) = 43.69 |
| Figure 5D | SOD content in cortex                                     | F (2, 15) = 32.81 |
| Figure 5E | GSH content in serum                                      | F (2, 12) = 76.95 |
| Figure 5F | GSH content in cortex                                     | F (2, 15) = 39.70 |
| Figure 5H | Nrf2                                                      | F (2, 6) = 21.01  |
| Figure 5I | HO-1                                                      | F (2, 6) = 8.755  |
| Figure 5J | NQO1                                                      | F (2, 6) = 35.94  |
| Figure 5K | The mRNA expression of HO-1 in the cortex                 | F (2, 15) = 18.11 |
| Figure 5L | The mRNA expression of NQO1 in the cortex                 | F (2, 15) = 40.31 |
| Figure 6B | BDNF in the CA3 region of hippocampus                     | F (2, 9) = 13.07  |
| Figure 6B | BDNF in the cortex                                        | F (2, 9) = 15.96  |
| Figure 6C | The mRNA expression of BDNF in the hippocampus            | F (2, 15) = 16.96 |
| Figure 6D | The mRNA expression of BDNF in the cortex                 | F (2, 15) = 50.53 |

| <b>Number</b> | <b>Name</b>                                         | <b>F-value</b>    |
|---------------|-----------------------------------------------------|-------------------|
| Figure 6F     | BDNF                                                | F (2, 6) = 70.69  |
| Figure 6G     | p-TrkB/TrkB                                         | F (2, 6) = 51.67  |
| Figure 6H     | p-CREB/CREB                                         | F (2, 6) = 17.15  |
| Figure 7B     | The length of PSD                                   | F (2, 15) = 39.69 |
| Figure 7C     | The width of PSD                                    | F (2, 15) = 22.65 |
| Figure 7E     | PSD-95 in the CA3 region of hippocampus             | F (2, 9) = 18.04  |
| Figure 7E     | PSD-95 in the cortex                                | F (2, 9) = 53.92  |
| Figure 7F     | The mRNA expression of PSD-95 in the hippocampus    | F (2, 15) = 29.28 |
| Figure 7G     | The mRNA expression of PSD-95 in the cortex         | F (2, 15) = 54.60 |
| Figure 7I     | Western blot analysis for PSD-95 in the hippocampus | F (2, 6) = 30.67  |
| Figure 8A     | NE content in cortex                                | F (2, 21) = 30.31 |
| Figure 8B     | 5-HT content in cortex                              | F (2, 21) = 25.00 |
| Figure 8C     | The mRNA expression of Htr1a in the cortex          | F (2, 15) = 14.35 |
| Figure 8D     | The mRNA expression of Htr2a in the cortex          | F (2, 15) = 58.07 |
| Figure 8F     | Western blot analysis for 5-HT1AR                   | F (2, 6) = 19.76  |
| Figure 8G     | Western blot analysis for 5-HT2AR                   | F (2, 6) = 68.35  |
