# Supplementary figures and images for: Sesamol ameliorates dextran sulfate sodium-induced depression-like and anxiety-like behaviors in colitis mice: the potential involvement of the gut–brain axis
Source: Royal Society of Chemistry journal article supplement (doi:10.1039/d1fo03888e), 2022-01-01

**Figure 11**

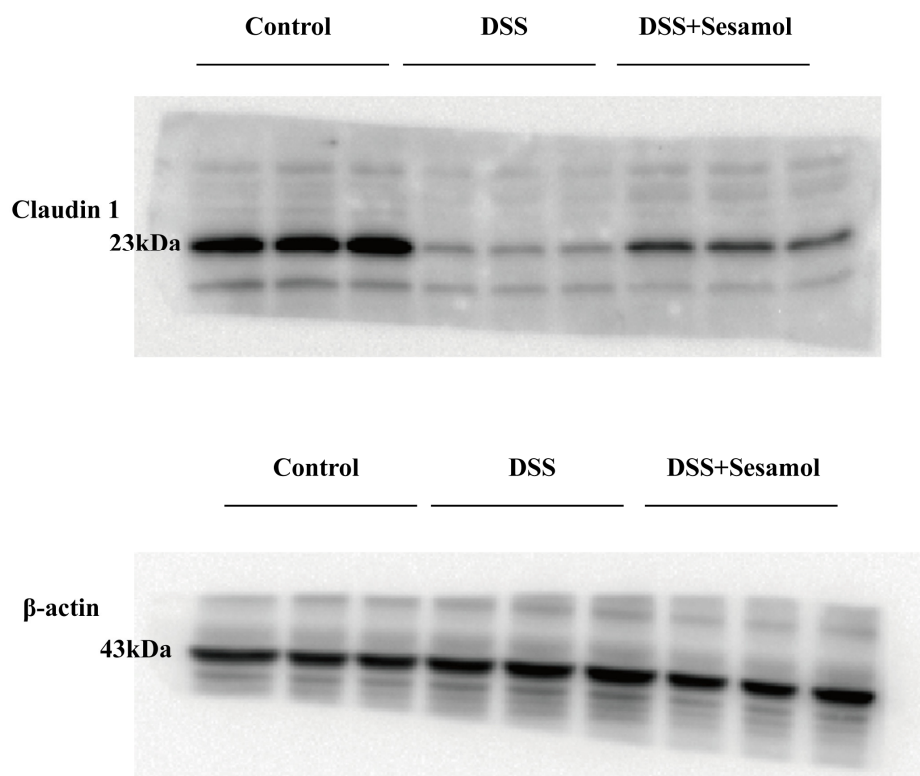

**Figure 3D**

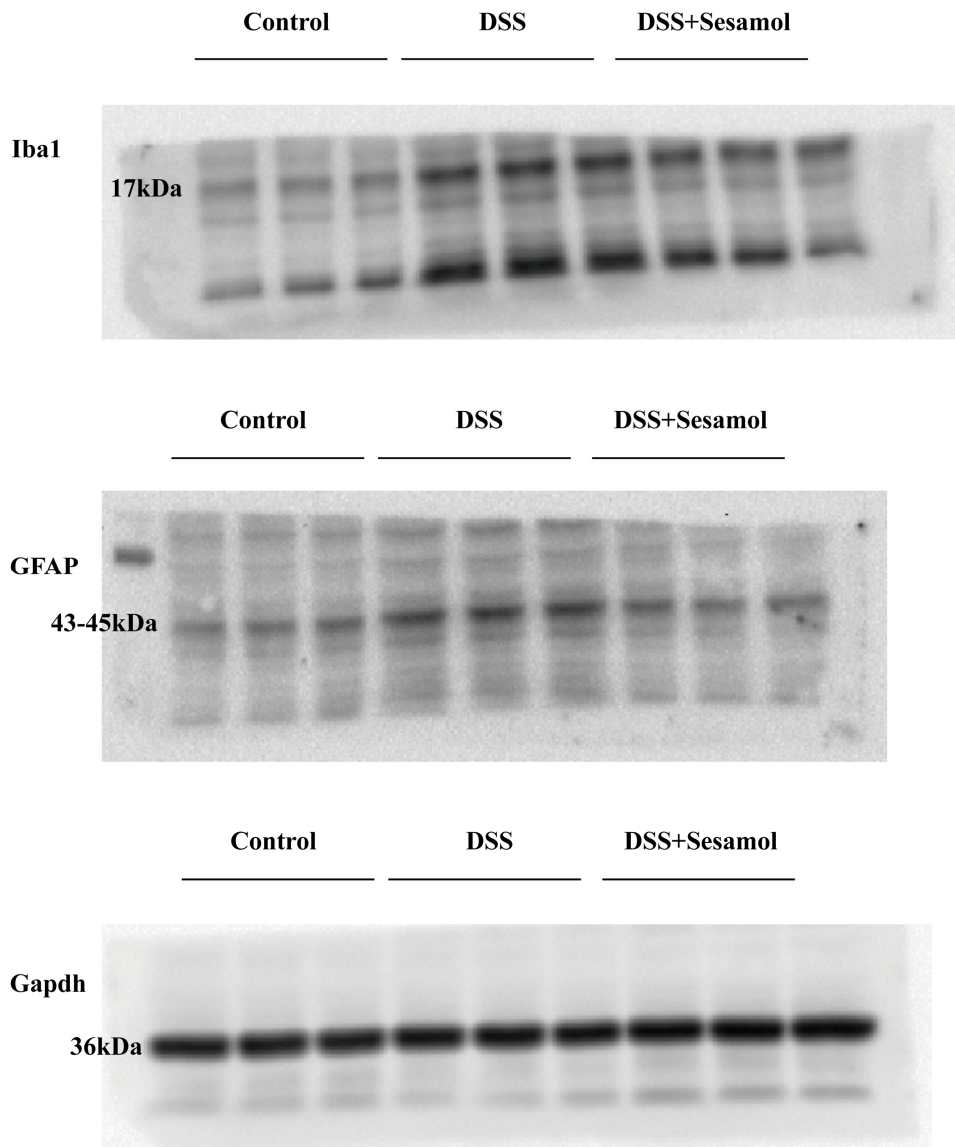

**Figure 4A**

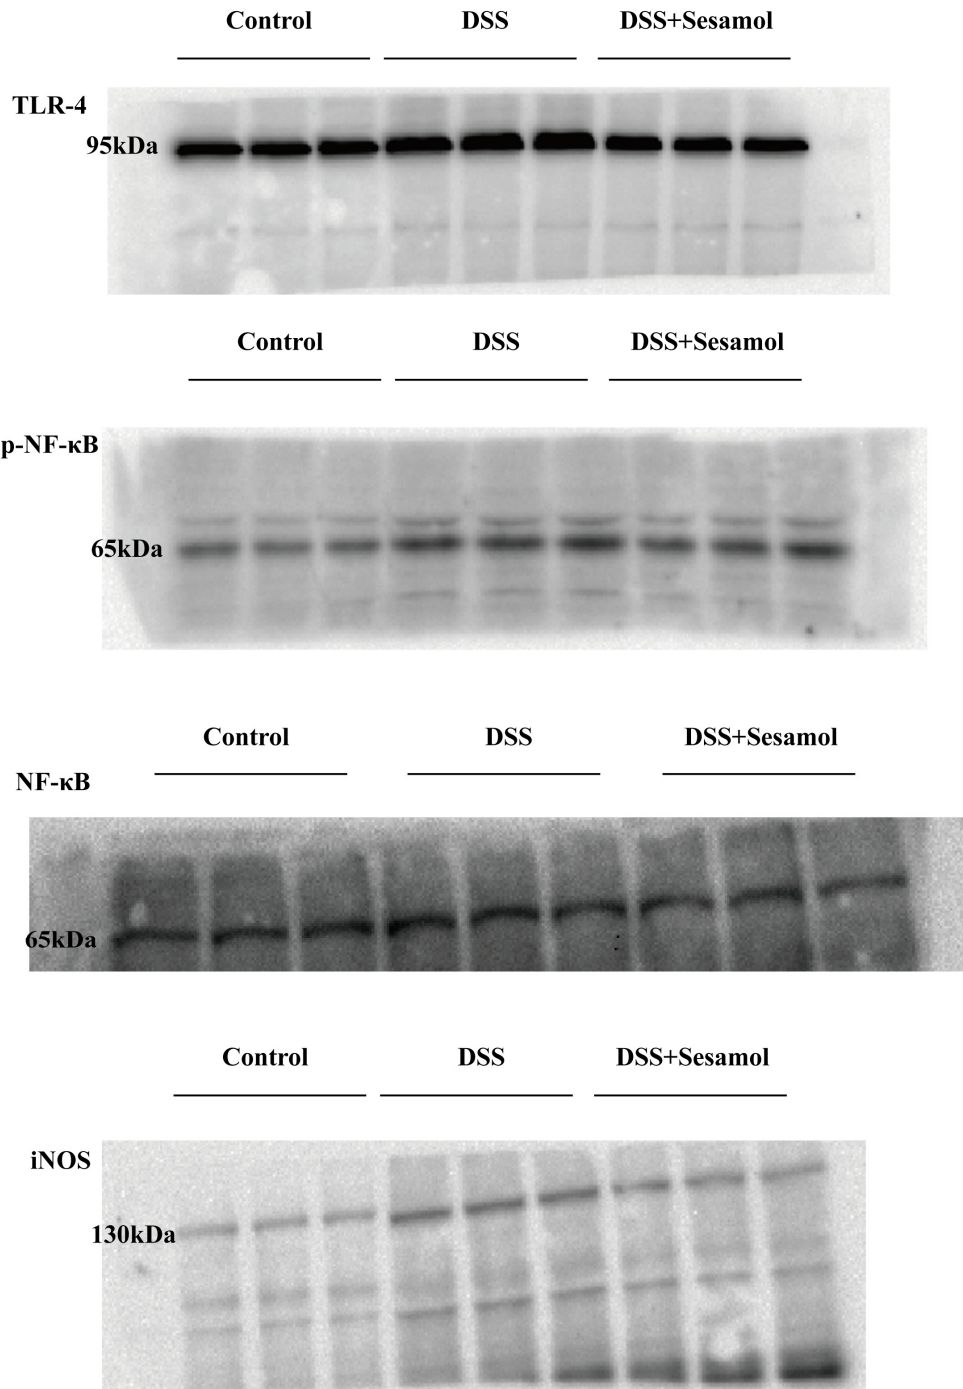

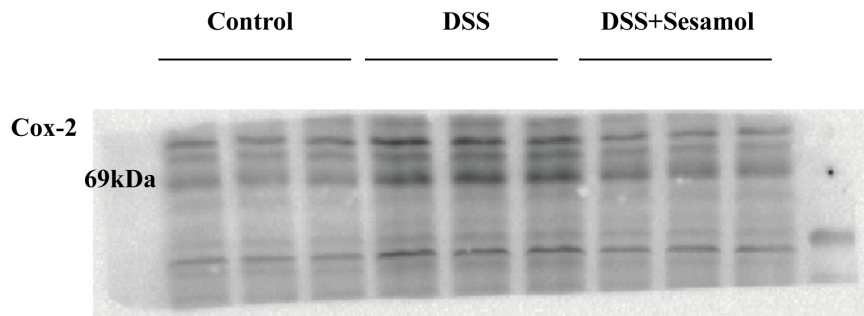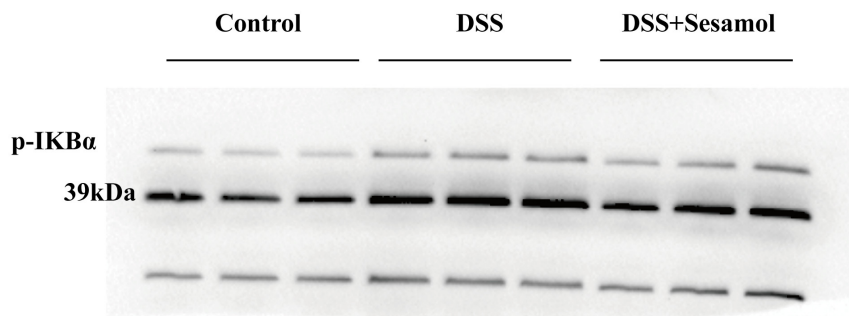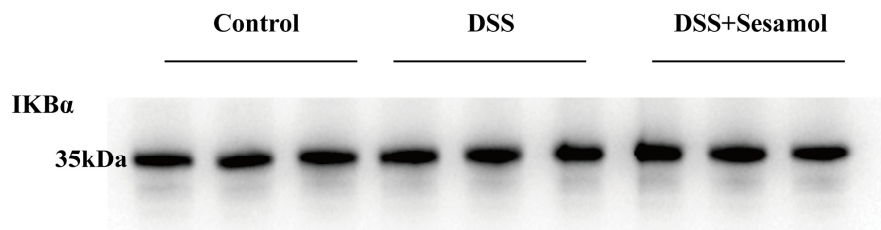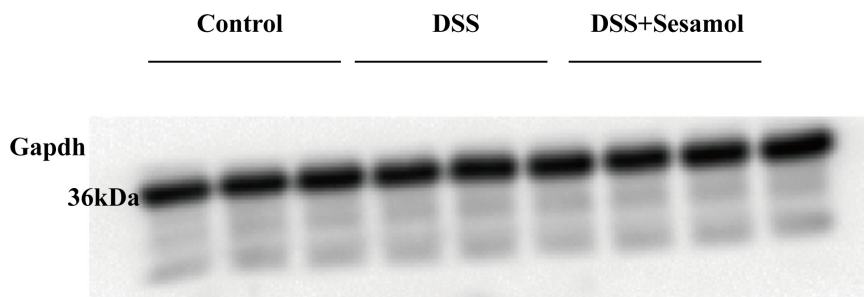

**Figure 5G**

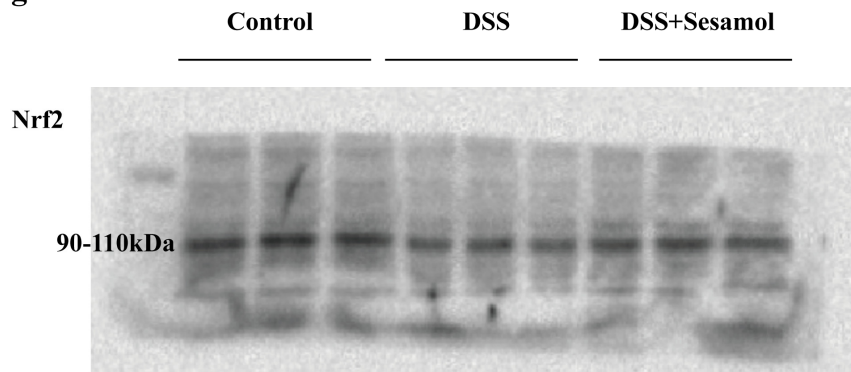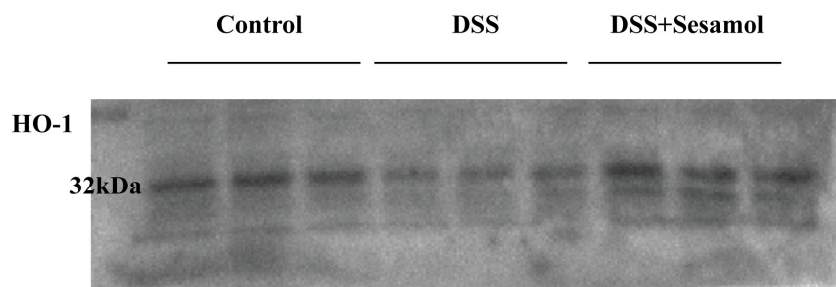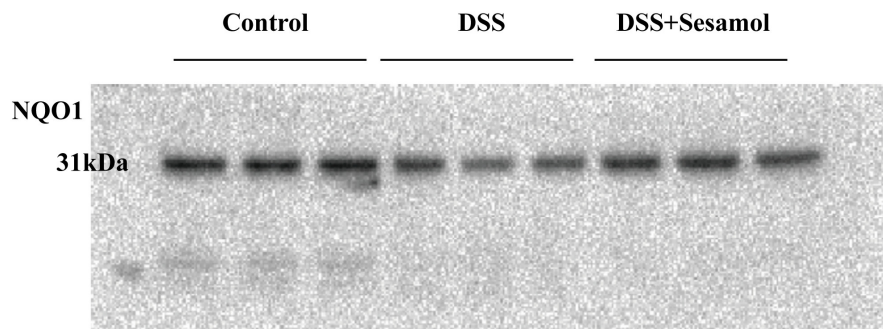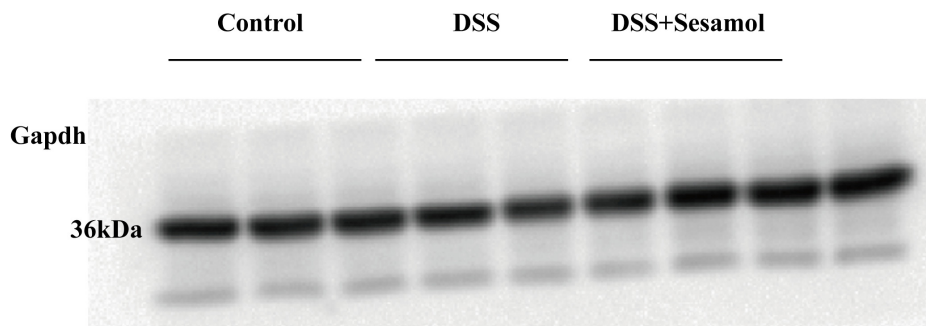

**Figure 6E**

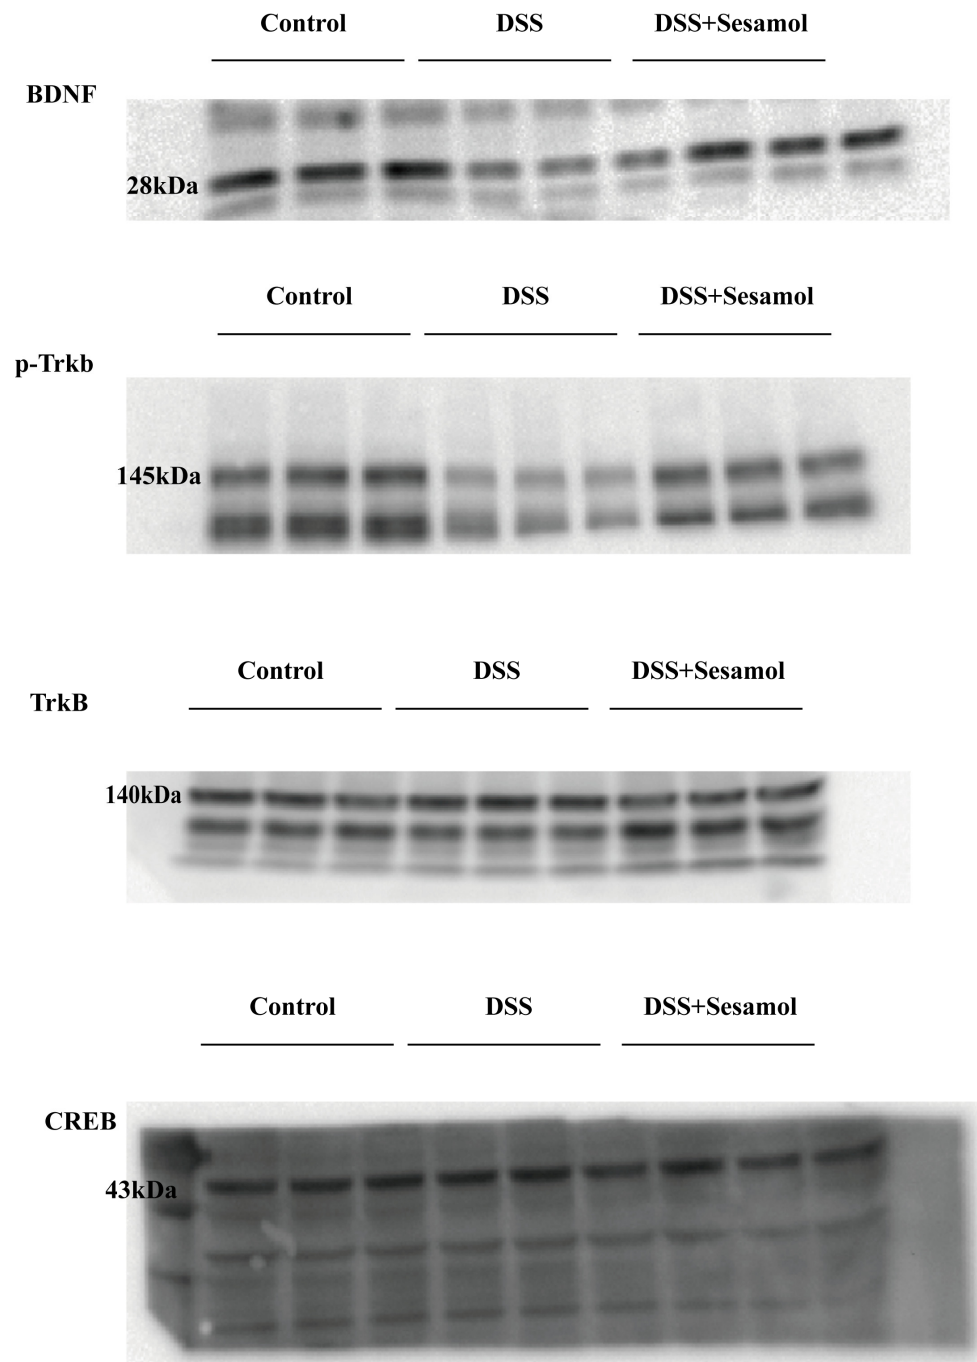

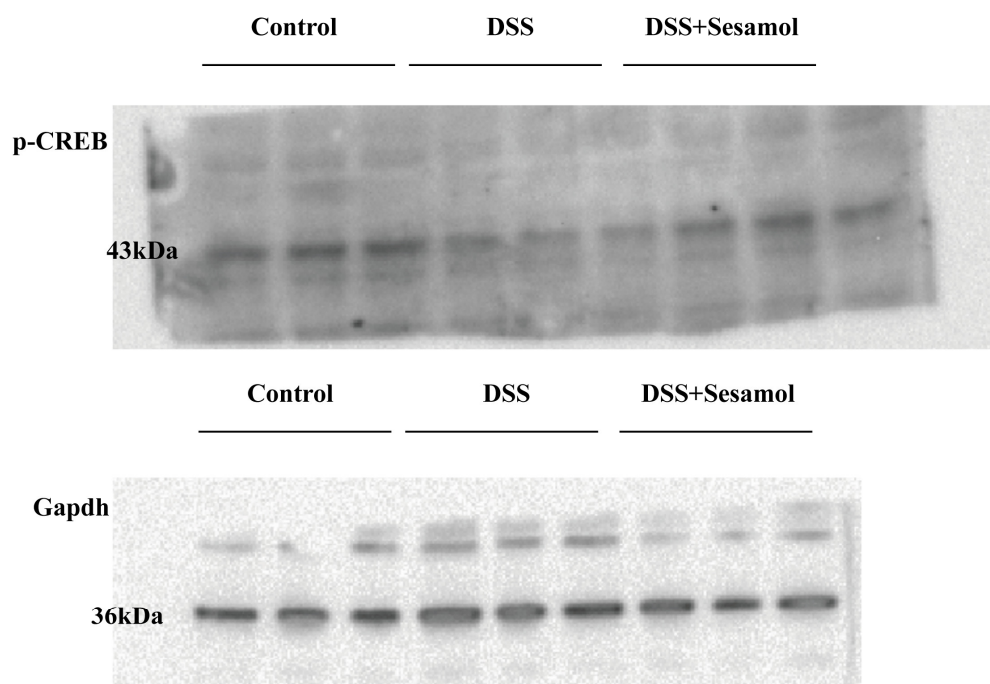

**Figure 7H**

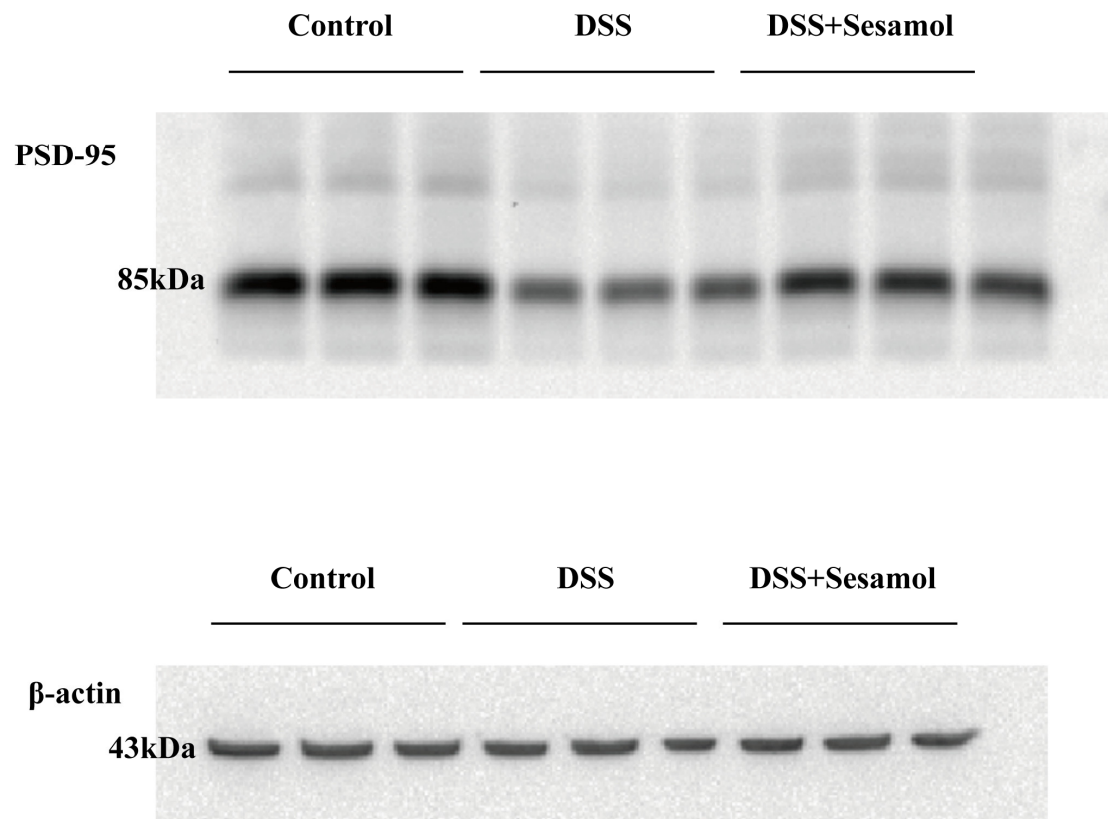



**Figure 8E**

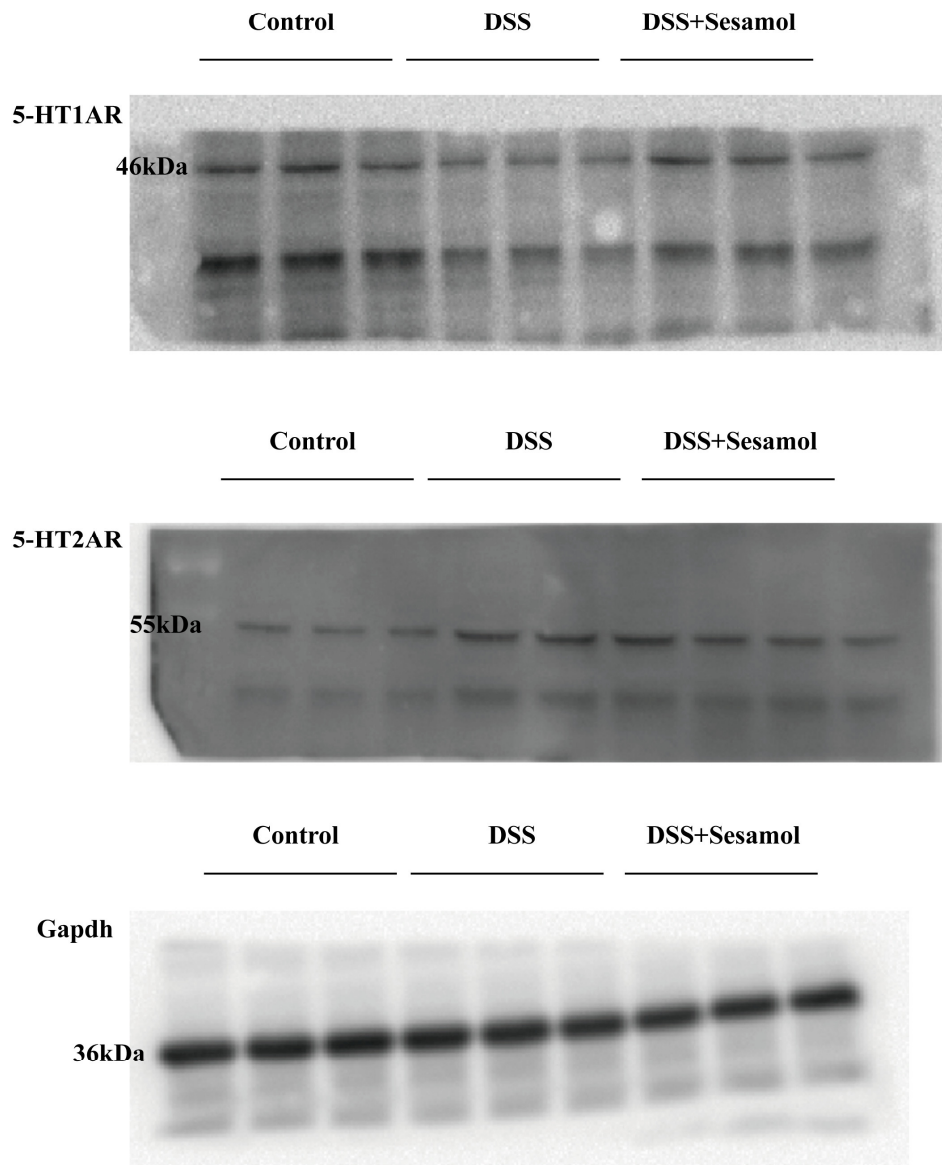

Supplement: d1fo03888e2.pdf [file d1fo03888e2.pdf]
